# Supplementary material
Source: HighWire-hosted journal article supplement (http://jpet.aspetjournals.org/highwire/filestream/147432/field_highwire_adjunct_files/0/264671SupplFigures.pdf)
Supplement: 264671SupplFigures.pdf [file 264671SupplFigures.pdf]

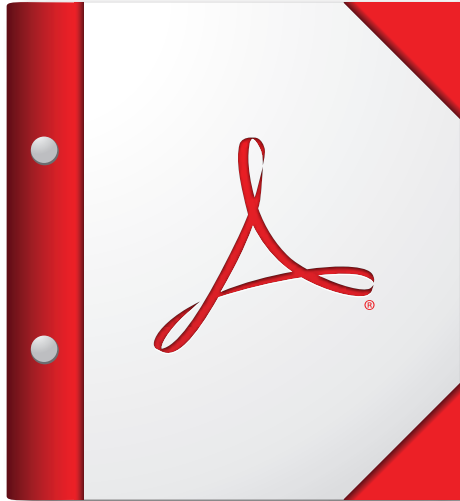

**For the best experience, open this PDF portfolio in  
Acrobat X or Adobe Reader X, or later.**

[Get Adobe Reader Now!](#)
